# Fast layer-fMRI VASO with short stimuli and event-related designs at 7T

Sebastian Dresbach<sup>1,\*</sup>, Renzo Huber<sup>1,2</sup>, Omer Faruk Gulban<sup>1,3</sup>, Rainer Goebel<sup>1,3</sup>

**1 Faculty of Psychology and Neuroscience, Maastricht University, Maastricht, Netherlands**

**2 National institute of Health, Bethesda, DC, USA**

**3 Brain innovation, Maastricht, the Netherlands**

**\* corresponding author**

## Abstract

Layers and columns are the dominant processing units in the human (neo)cortex at the meso-  
scopic scale. While the blood oxygenation dependent (BOLD) signal has a high detection  
sensitivity, it is biased towards unwanted signals from large draining veins at the cortical sur-  
face. The additional fMRI contrast of vascular space occupancy (VASO) has the potential to  
augment the neuroscientific interpretability of layer-fMRI results by means of capturing com-  
plementary information of locally specific changes in cerebral blood volume (CBV). Specifically,  
VASO is not subject to unwanted sensitivity amplifications of large draining veins. Because of  
constrained sampling efficiency, it has been mainly applied in combination with efficient block  
task designs and long trial durations. However, to study cognitive processes in neuroscientific  
contexts, or probe vascular reactivity, short stimulation periods are often necessary. Here, we  
developed a VASO acquisition procedure with a short acquisition period (895 ms volume acqui-  
sition) and sub-millimetre resolution. During visual event-related stimulation, we show reliable  
responses in visual cortices within a reasonable number of trials ( $\sim 20$ ). Furthermore, the short  
TR and high spatial specificity of our VASO implementation enabled us to show differences in

laminar reactivity and onset times. Finally, we explore the generalizability to a different stimulus modality (somatosensation). With this, we showed that CBV-sensitive VASO provides the means to capture layer-specific haemodynamic responses with high spatio-temporal resolution and is able to be used with event-related paradigms.

## Introduction

Cortical layers give rise to fundamental processing units like the cortical microcircuit (Bastos et al., 2012; Douglas and Martin, 2004) and may inform about feedforward and feedback characteristics of brain regions in human and animal brains (Felleman and Van Essen, 1991; Markov et al., 2014). Due to technological advancements in the last decade, neuroscientists are now able to study these structures non-invasively in humans using functional magnetic resonance imaging (fMRI) at high resolutions ( $<1\mu\text{L}$  voxel volume, Polimeni et al., 2010). However, when approaching this spatial scale, several challenges remain. Most notably, the so-called “draining vein” effect is known to have a major impact on the fMRI signals measured across cortical depths when using the popular gradient echo (GE) blood-oxygenation level dependent (BOLD) sequences (Turner, 2002). Specifically, the venous blood is drained from deep to superficial layers within the cortex leading to a spatial displacement of neuronal responses measured indirectly by the BOLD signal. This decreases the effective spatial specificity, despite having small voxel sizes (De Martino et al., 2013; Menon and Goodyear, 1999; Self et al., 2019).

To counter the neurovascular confounds in the BOLD signal, additional measurements of cerebral blood flow (CBF) and cerebral blood volume (CBV) have been proposed. These approaches promise higher specificity to the neural site of activation by being less affected by the draining veins (L. Huber et al., 2019). One of the most widely used non-invasive measurements of CBV is vascular space occupancy (VASO, Hua et al., 2013; Lu et al., 2003). Slice-selective slab-inversion (SS-SI) VASO (L. Huber et al., 2015, henceforth referred to as VASO) has been used to study fundamental neuroscientific mechanisms on the mesoscopic scale (L. Huber et al., 2017; Persichetti et al., 2020; Y. Yu et al., 2019). However, the challenging contrast-to-noise-ratio of sub-millimeter fMRI and the constrained sampling efficiency of VASO have so far hindered wide adaptation of its application in neuroscientific application studies with fast stimulus designs. While previous studies suggest that slow event-related paradigms with 6 s

long task durations are feasible with layer-fMRI VASO (Persichetti et al., 2020), it is not clear 45  
if VASO can be pushed to even faster designs. Furthermore, it has not been clear until now if 46  
and how much the detection sensitivity is compromised in layer-fMRI VASO for event-related 47  
design tasks compared to commonly used block-design tasks. 48

Event-related task designs are widely-adopted in fMRI to conduct cognitive neuroscience 49  
research (Huettel, 2012). This is because event-related task designs provide flexibility in stim- 50  
ulus presentation to control for a wide range of confounds like psychological effects (carryover 51  
effects, habituation, anticipation, etc., Rosen et al., 1998). Other uses of event-related task 52  
designs revolve around studying the individual trials e.g. to characterize learning, correlating 53  
responses to behavioral variables (e.g. reaction time), or post-hoc sorting of trials based on 54  
e.g. subjective perceptions [e.g. Formisano et al., 2002; Heynckes et al., 2023; Schneider et al., 55  
2019). Although some of these aspects are also achievable with longer stimulus durations (e.g. 6  
second long randomized stimuli as implemented by Persichetti et al. (2020), most other benefits 57  
of event-related task designs can only be exploited by using shorter stimulus durations. 58

In this study, we implemented, tested, and validated a VASO sequence protocol with a short 59  
repetition time (TR, 2.57 s) that provides the means to acquire layer-specific haemodynamic 60  
responses with high temporal resolution and sufficient coverage to capture multiple distant 61  
brain areas. For this, we used high resolution (0.88 mm<sup>3</sup> isotropic nominal voxel size) fMRI at 62  
ultra-high field strength (7 Tesla). We further characterized the sub-millimeter CBV responses 63  
and their detection sensitivity to block and event-wise stimulation. Third, we explored the 64  
generalizability to different stimulus modalities (vision and somatosensation). As the VASO 65  
sequence yields VASO and BOLD images, we made use of both contrasts to present our results, 66  
which offers complementary information. Using our new sequence protocol, we showed that it is 67  
possible to capture CBV-VASO responses to stimuli with short durations in a fast event-related 68  
design within a reasonable amount of trials. Our results form the foundation of a new avenue 69  
for further adoption of VASO in cognitive neuroscience and physiology studies. 70

## Materials and Methods

71

### Participants

72

10 right handed participants (2 female, age range: 23-31 years, mean age: 27.9 years), with no neurological damage participated in the study after providing written informed consent. The paradigm was approved by the local Ethics Review Committee for Psychology and Neuroscience (ERCPN) at Maastricht University (ERCPN refnr 180\_03\_06\_2017).

73

74

75

76

### Imaging parameters

77

All participants underwent scanning using a "classical" 7T Magnetom whole body scanner (Siemens Healthineers, Erlangen, Germany), equipped with a 1Tx, 32Rx head RF coil (Nova Medical, Wilmington, MA, USA) at Scannexus B.V. (Maastricht, The Netherlands). Functional scans were performed with 3D echo-planar imaging (Poser et al., 2010) VASO (L. Huber et al., 2014) and a nominal resolution of  $0.875 \times 0.875 \times 0.88$  mm<sup>3</sup>, 16 slices, TI/volumeTR/pairTR/TE = 1272/895/2570/18 ms, partial Fourier factor = 6/8 using projection onto convex sets (POCS, Nakamura et al., 2016), reconstruction with 8 iterations, FLASH GRAPPA 3 (Talagala et al., 2016), varying flip angles between 26 and 90°, read bandwidth = 1266 Hz/Px, first phase encoding direction along anterior-posterior axis with axial-like tilted slice orientation, matrix size =  $152 \times 148$ , field of view (FOV) =  $133 \times 129.542$  mm in read and first phase encoding directions respectively. We used the vendor-provided 'improved GRAPPA WS' algorithm with at least 1000 fold over regularization and small GRAPPA kernels of  $2 \times 3$  (phase  $\times$  read). Parameters are summarized in **Figure 1B**, a scan protocol is available on github ([https://github.com/sdres/sequences/blob/master/20211022\\_Seb.pdf](https://github.com/sdres/sequences/blob/master/20211022_Seb.pdf)) and the sequence is available for VB17B via SIEMENS' C2P app store Teamplay.

78

79

80

81

82

83

84

85

86

87

88

89

90

91

92

Two participants were invited for a second session, in which we compared the above protocol to a version of the sequence with a longer TR. Specifically, we inserted 500 ms delays between the image readouts with and without blood-nulling, as well as between the readout of the BOLD (also referred to as 'not-nulled') image and the consecutive inversion pulse. Thus, the pair TR was 3570 ms, while all other parameters remained equal.

93

94

95

96

97

Slice position and orientation were chosen individually for each participant. We covered

98

bilateral calcarine sulci and the hand area of the right postcentral gyrus (both indicated in **Figure 1A**). We localized the area of interest in the right somatosensory cortex based on the position of the ‘hand-knob’ area on the precentral gyrus, opposite of which the finger representations are located on the postcentral sulcus. Note that, targeting both the visual and the somatosensory cortex turned out to be challenging without significant fold-over artifacts due to the small FOV and limited number of slices. In cases where coverage of both visual and somatosensory cortices was not possible ( $n = 5$ ), we prioritized the visual cortex.

Finally, we either acquired high-resolution whole-brain anatomical images (0.7 mm isotropic, 240 slices,  $T11/T12/TR/TE = 900/2750/5000/2.47$  ms,  $FA1/FA2 = 5^\circ/3^\circ$ , bandwidth = 250 Hz/Px, acceleration factor = 3, FoV =  $224 \times 224$  mm) using MP2RAGE (Marques et al., 2010), or images were available from previous scans with similar parameters. For one participant, we neither acquired MP2RAGE data due to time constraints, nor was there previous data available.

## Stimuli

Stimuli consisted of flickering checkerboards presented at 16 Hz and vibrotactile stimulation of all 5 digit-tips (left hand) by means of a piezoelectric stimulator at 25 Hz (mini PTS system, Dancer Design, UK). Both means of stimulation are displayed in **Figure 1D**. Stimuli were presented either in blocks or as events while the run duration was kept to 12.5 minutes in both cases (**Figure 1C**). We acquired 1-2 blocked- and 2-4 event wise stimulation runs per participant for the main experiment. For the comparison between long and short TR protocols, we acquired 4 runs of block-wise stimulation runs (2 per TR duration). During block-wise stimulation runs, we presented stimuli for 30 s with 30 s of resting fixation in between blocks, resulting in 12 blocks per run with an additional rest period before the first stimulation block. Event-wise stimulation runs started with a 19 s baseline period and then stimuli were presented for 2 s per trial with inter-trial intervals between 3 and 10 s chosen from a uniform distribution, resulting in 84 trials per run (12.5 minutes). These highly irregular inter-trial intervals were chosen to accurately capture the haemodynamic responses of BOLD and VASO. The stimulation pattern was generated once and then used for all runs in order to allow averaging. The stimulation was controlled via Psychopy 3 v2020.2.4 (J. Peirce et al., 2019; J. W. Peirce, 2007) scripts, which can be found at: <https://github.com/sdres/eventRelatedVASO/tree/main/code/stimulation>.

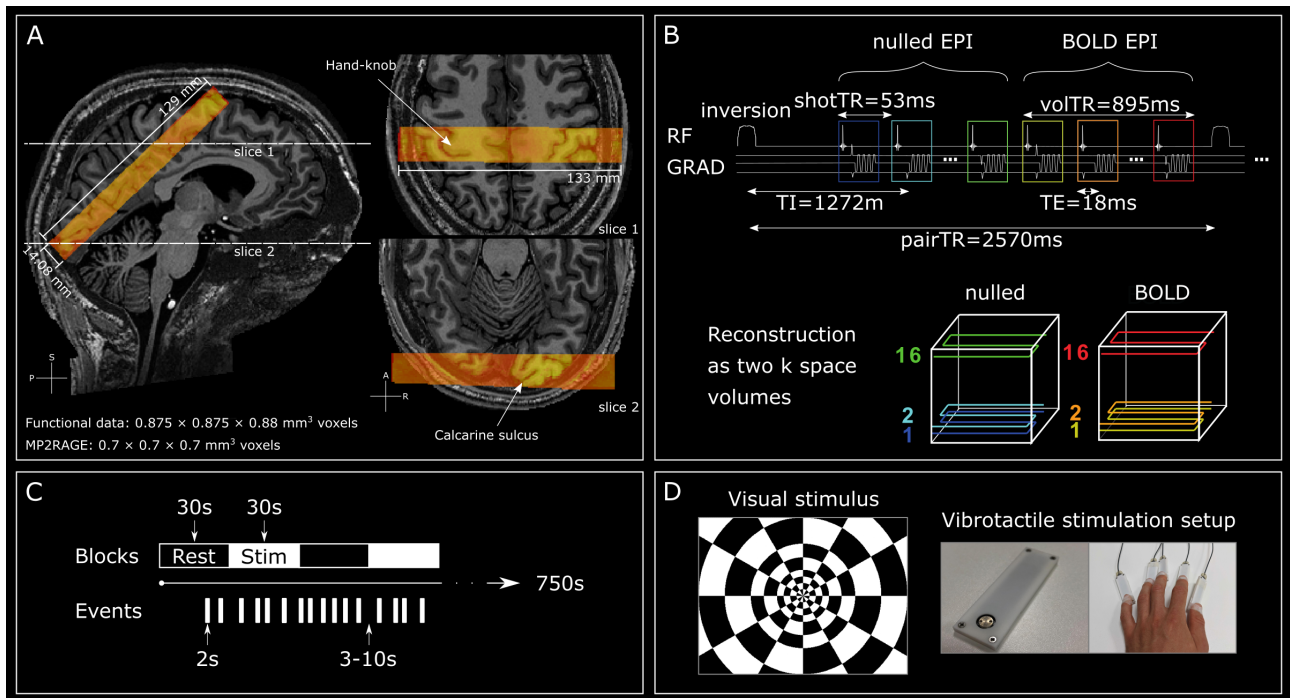

**Figure 1: fMRI data acquisition and stimulation protocol.** **A** Functional EPI data (warm colors) overlaid on MP2RAGE UNI image (sub-07). The fMRI slab covered bilateral calcarine sulci (lower right) and when possible the hand area of the right postcentral gyrus (upper right). **B** Functional EPI data acquisition details giving a schematic overview of relevant imaging parameters. (Note: nulled and BOLD images are acquired in an interleaved fashion. Both volumes are later used to derive the ‘VASO’ images.) **C** Illustration of block and event-wise stimulation runs. Block-wise stimulation consisted of 30s on-off periods. Event-wise stimuli were 2 seconds in duration separated by inter-trial intervals of 3-10 seconds which were randomly chosen from a uniform distribution. **D** Means of stimulation. Left: Flickering checkerboard. Contrast reversals were displayed at 16 Hz. Right: A single piezoelectric stimulation device. The silver disc vibrates at 25 Hz and stimulates the fingertips. On the right, 5 devices are attached to all fingers of the left hand with elastic tape.

In the scenario described above, visual and tactile stimulation was always presented concurrently. For five participants, we deviated from this stimulation pattern. During one session of one participant, the vibrotactile stimulation device was not available. Therefore, we only presented visual stimuli during that session. For four other participants, we randomized visual only and visuo-tactile stimulation during the event-related runs. This way, we aimed to disentangle potential multisensory and physiological effects of laminar reactivity.

## Processing

The analysis code is available at <https://github.com/sdres/eventRelatedVASO>. Briefly, initial motion-correction was performed within runs for nulled and not-nulled time-series separately using ANTsPY v0.2.7 (Avants et al., 2011). We used an automatically generated brain



mask (3dAutomask in AFNI 22.1.13, Cox, 1996) to calculate cost functions in brain tissue only. 138  
We then computed T1w images in EPI-space derived from the combined nulled and BOLD im- 139  
ages for each run (3dTstat with -cvarinv) using AFNI, performed bias field correction using 140  
ANTS v2.3.5.dev238-g1759e (N4BiasFieldCorrection, Tustison et al., 2010) and registered the 141  
resulting image to the first event-wise stimulation run using ANTsPY. We then performed the 142  
motion correction again from scratch, while concatenating the transformation matrices from 143  
within and between run registration. Due to the small imaging slab, registering different ses- 144  
sions of the same participant was challenging. Therefore, we treated them as independent 145  
datasets. However, as they were only acquired to assess differences between long and short TR 146  
flavors of the protocol, this does not influence the results of our main experiment. 147

The VASO sequence acquires images with BOLD and CBV weighting concomitantly in 148  
an interleaved fashion. Therefore, we temporally upsampled the motion corrected data with 149  
a factor of 2 (3dUpsample in AFNI with 7th order polynomial interpolation). We then per- 150  
formed BOLD correction and computed standard measures for quality control (tSNR, skew, 151  
and kurtosis) using LayNii (v2.2.1, LN\_BOCO and LN\_SKEW respectively; L. ( Huber et al., 152  
2021). General linear model (GLM) analyses were performed in FSL (Woolrich et al., 2001, 153  
v6.0.5.2, contrast: stimulation vs rest). MP2RAGE UNI images were registered to the T1w 154  
EPI image of the first event-wise stimulation run, first, using manual alignment in ITK-SNAP 155  
(v3.8.0, Yushkevich et al., 2006, then an automatic alignment (affine transformation, mutual 156  
information cost metric) while using the brain mask generated for the motion correction to 157  
guide registration. Finally, anatomical images were registered nonlinearly to the T1 weighted 158  
image in EPI space using ANTS. 159

Borders between gray matter (GM) and cerebrospinal fluid (CSF) and between GM and 160  
white matter (WM) of ROIs were manually drawn in FSLeves v0.31.2 (McCarthy, 2023) based 161  
on the activation in response to block-wise stimulation and the registered MP2RAGE UNI 162  
contrast. For the participant, where no MP2RAGE data was available, we drew the borders 163  
based on residual contrast of the T1-weighted images directly in EPI space. All manually 164  
drawn masks are available alongside the raw data. Finally, layering was performed on spatially 165  
upsampled data (3dresample factor 5 in-plane) using the equidistant approach as implemented 166  
in LayNii (LN2\_LAYERS). For the estimation of cortical depth profiles of GLM analyses, we 167

defined 11 depth bins, while for the finite impulse response (FIR) analysis across cortical depth, 168  
we estimated three depth bins (deep, middle, superficial) to allow for appropriate averaging. 169

For the analysis of the block-wise stimulation runs, we ran a GLM with one predictor for 170  
the stimulation times, convolved with a standard gamma haemodynamic response function 171  
without temporal derivative (mean lag: 6 s, std. dev: 3 s). Here, we applied a high-pass filter 172  
(cutoff = 0.01 Hz) and no additional smoothing. To estimate the temporal response for blocked 173  
stimulation, we averaged epochs with stimulation with 4 volumes before stimulus onset and 8 174  
volumes after cessation. The percent signal change was computed with respect to the 30 s 175  
rest-periods in between stimulation blocks. 176

Responses to event-wise stimulation runs were first estimated with a GLM, similar to the 177  
blocked stimulation for better comparison. We then ran a GLM analysis using finite impulse 178  
response models on the event-wise stimulation data. Here, we modeled 10 timepoints after 179  
stimulus onset, resulting in a window of 13.08 seconds. 180

To estimate the number of trials necessary to obtain a reliable signal, we extracted time- 181  
courses from the ROIs, epoched the data with a window from stimulus onset until 8 s after 182  
cessation. We then computed the overall epoch activity across all participants. For each run, 183  
we then computed a cumulative average for 1 up to 84 trials, where 84 was the number of trials 184  
in a run. For each number of averaged trials, we computed the sum of squares between the 185  
values for each timepoint separately and the average response across all participants. Based 186  
on anatomical landmarks, we will refer to ROIs in the visual cortex as V1 and ROIs on the 187  
postcentral gyrus as S1. 188

## Results 189

In the following, we will focus on the results in visual cortices as this was the primary area of 190  
interest of this study. The exploratory results for the somatosensory cortex will be described 191  
briefly afterwards. Finally, one participant (sub-10) consistently showed excessive head motion 192  
well above the voxel size and was therefore excluded from further analyses (**Supplementary** 193  
**Figure S1**). 194



## Block-wise stimulation

195

Regarding the main experiment, we first examined the results from block-wise stimulation for two reasons. First, we compared our results to previous research to see whether the results obtained with our fast protocol match the expected patterns. Second, we used these data to determine ROIs for further analyses.

As expected, block-wise stimulation elicited strong signal changes in the visual cortices for both BOLD and VASO in all participants. **Figure 2A** shows GLM activation in response to stimulation (z-scores, contrast: stimulation vs. rest) overlaid on an MP2RAGE UNI image for one individual. As expected, BOLD activation scores are generally higher than for VASO. On the other hand, the active voxels are mostly constrained to cortical GM for VASO, while BOLD shows largest z-scores in CSF. Based on this, we manually delineated ROIs from which we extracted signal changes over time and z-scores across cortical depth. As expected, the temporal profiles of the BOLD and VASO responses show sustained activity, peaking around 10s with an additional off-response after stimulus cessation (**Figure 2B**). Interestingly, we also observed a strong post-stimulus undershoot for BOLD, while this was less pronounced in VASO. Finally, **Figure 2C** shows the activation profile across cortical depths. Here, we see the well reproduced result of increasing activity towards the surface for BOLD and the inverted U-shaped activity pattern for VASO. These likely reflect the drainage of deoxygenated blood towards the pial surface and the thalamocortical input to layer 4, respectively (Felleman and Van Essen, 1991; Turner, 2002). Taken together, these results assured us that our protocol gives robust results with paradigms.

## Event-wise stimulation

216

Event-wise stimulation also elicited signal changes in the visual cortices for both BOLD and VASO in all participants, albeit to a lesser degree. **Figure 3A** shows GLM activation in response to stimulation (z-scores, contrast: stimulation vs. rest) for two runs of one individual overlaid on an MP2RAGE UNI image. Despite the lower z-scores compared to block-wise stimulation in both BOLD and VASO, clear patterns can be seen without the need for additional processing (e.g. denoising/ smoothing). Specifically, activated VASO voxels follow the cortical ribbon as expected, whereas BOLD responses are strongest at the cortical surface and in CSF.

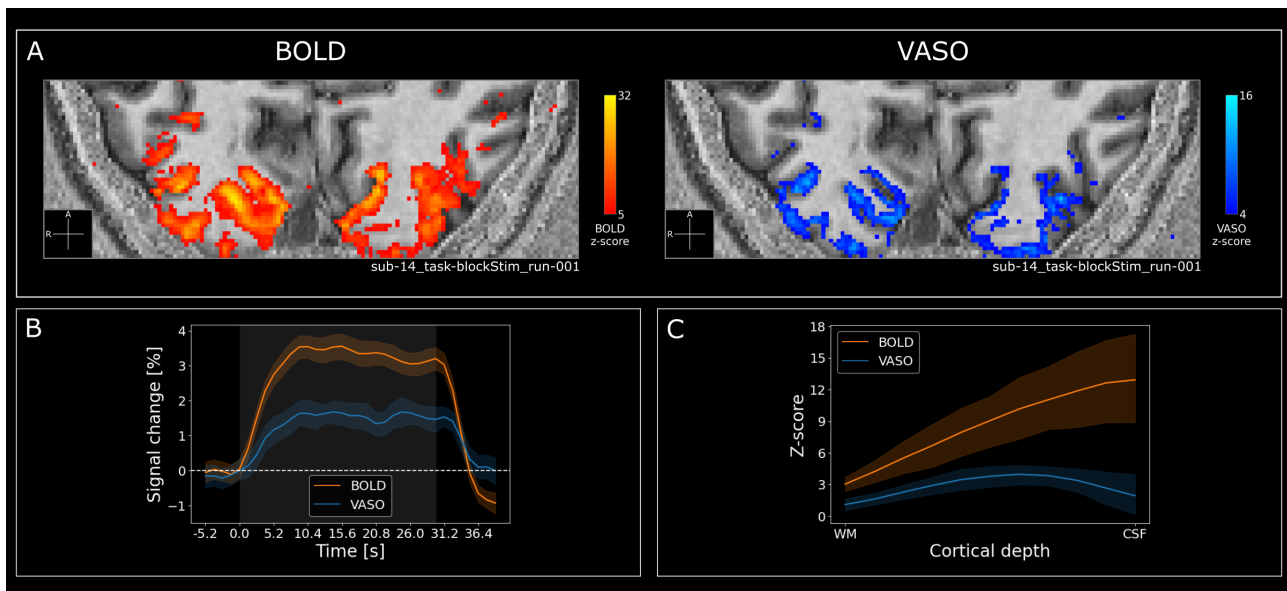

**Figure 2: Block-wise stimulation results show robust activation.** **A** GLM activation in response to stimulation (z-scores, contrast: stimulation vs. rest) overlaid on MP2RAGE UNI image. Note that here we show results from a single run (12.5 minutes). **B** Group-level averages showing the BOLD and VASO signal change across all layers in response to stimuli with a duration of 30s (shaded gray area). Colored shaded areas represent 95% confidence intervals across blocks. **C** Group-level layer profiles showing GLM activation in response to stimulation (z-scores, contrast: stimulation vs. rest) for BOLD and VASO in V1 across cortical depths. Colored shaded areas represent 95% confidence intervals across participants.

To investigate the haemodynamic response over time, we performed a deconvolution analysis 224  
using a FIR model as implemented in FSL with three layer bins (**Figure 3B**). Responses for 225  
both BOLD and VASO followed the expected haemodynamic response. As expected, BOLD 226  
signal changes increased from deep to superficial layers. This was less apparent in VASO. 227  
To our surprise, group-level VASO responses showed comparable signal changes for middle 228  
and superficial layers as opposed to the strongest response in middle layers for block-wise 229  
stimulation. This was highly variable across participants (**Supplementary Figure S2**). Most 230  
notably however, responses in superficial layers were delayed with respect to deep and middle 231  
layers (white arrow in the right panel of **Figure 3B**). This finding was highly consistent across 232  
participants, irrespective of superficial layer response amplitude (**Supplementary Figure S2**). 233  
Also note that the response in deep layers does not differ strongly between BOLD and VASO. 234  
This might indicate similar detection sensitivity between BOLD and VASO for GM close to 235  
the WM/GM border. 236

The stimulus consisted of visual and tactile stimulation and so, we tested whether the lam- 237  
inar timing differences might be explained by effects of multisensory integration. For this, we 238

randomly presented visual or visuo-tactile stimuli in an event-related fashion in 4 participants. 239  
The results are shown in **Supplementary Figure S3**. Briefly, visual and visuo-tactile stimu- 240  
lation evoked very similar responses in superficial and middle layers for BOLD and VASO, thus 241  
ruling out multisensory effects as an explanation for the delayed peak in superficial layers for 242  
VASO. In deep layers, visuo-tactile stimulation showed a slightly prolonged response compared 243  
to visual stimulation only. This effect was present in the BOLD and VASO data, while being 244  
more pronounced in the latter. However, this effect is rather small (within error bars) and has 245  
to be interpreted with caution. 246

Finally **Figure 3C** shows the activation profile across cortical depths. Also here, the 247  
increasing activity towards the surface for BOLD is clearly visible. The inverted U-shaped 248  
activity pattern for VASO is also present albeit less clear than for the block-wise stimulation 249  
results. Taken together, these results show that it is possible to capture event-related responses 250  
to short stimuli using CBV-based VASO measurements. 251

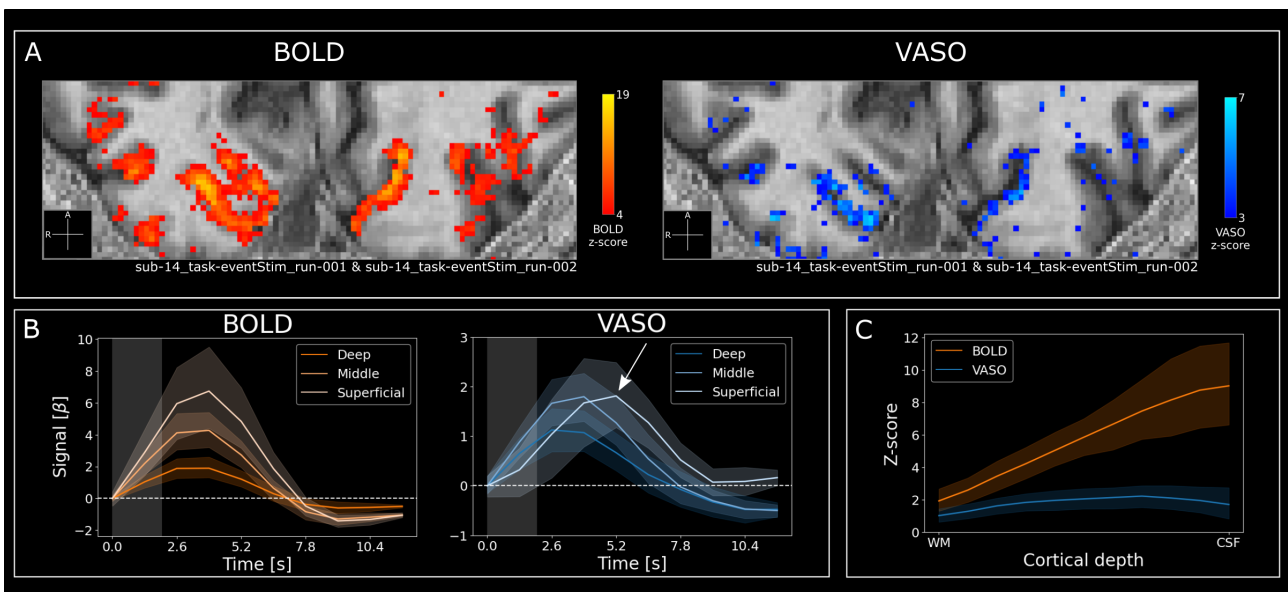

**Figure 3: Event-wise stimulation results also show robust activation.** **A** GLM activation in response to event-wise stimulation (z-scores, contrast: stimulation vs. rest) in V1 of a representative participant (sub-14) overlaid on an MP2RAGE UNI image. Note that here we show data from two runs (25 minutes). **B** Group-level average responses showing the BOLD (left) and VASO (right) model fit (FIR model with 10 predictors) for three layers (deep, middle, superficial) in response to stimuli with a duration of 2 seconds (shaded gray area). The white arrow indicates the delayed peak for the superficial cortical depth in VASO. The colored shaded areas represent 95% confidence intervals across runs. **Supplementary Figure S2** shows the same plot for 3 individuals. **C** Group-level layer profiles showing GLM activation in response to stimulation of 2 seconds (similar to **Figure 3A**, z-scores, contrast: stimulation vs. rest) for BOLD and VASO in V1 across cortical depths. Colored shaded areas represent 95% confidence intervals across participants.

## How many trials do we need?

**Figure 4A** shows the response stabilization when cumulatively averaging trials. Here, the average of a given number of trials is compared to the response across all participants. The number of average trials ranges from 1 to 84 (a run had a maximum of 84 trials). Thus, the last datapoint on the x-axis constitutes the difference between the average response of a run and the overall mean. While the difference between a few trials and the response across all participants is large, the response quickly approaches the overall average within a few more trials. Across participants, the 5% of the error dynamic range for VASO is reached when averaging 20 trials. The 5% of the error dynamic range for BOLD is reached when averaging 23 trials. The slightly higher number of averages needed for BOLD is due to the smaller dynamic range. Still, this shows that the noise level of our data is acceptable to efficiently capture the response to event-related stimuli without the need to average over long periods of time. Note that we used strong stimuli (flickering checkerboards) and did not perform any experimental manipulation. Most neuroscientific investigations use weaker tasks with control conditions that are very similar to the experimental condition. Therefore, in these experiments the number of presented stimuli will most likely have to be higher in order to reliably separate responses to the conditions. In **Figure 4B** we directly compared GLM activation in response to block- and event-wise stimulation for BOLD and VASO separately. In our BOLD data, we see lower signal intensity for event- than for block-wise stimulation. This decrease in activation scores is similar across cortical depths. In VASO, the pattern is more complex. While overall signal intensity does not differ much between block- and event-wise stimulation for deep and superficial layers, the group-level response peak is more biased towards the surface for event-wise stimulation. As discussed before, this response peak shows large variability across participants (see previous section and **Supplementary Figure S2**). Further, we aimed to estimate the change in detection sensitivity when employing block- vs. event-wise stimulation designs. From the data plotted in **Supplementary Figure 4B**, we approximated the area under the curve for block- and event-wise stimulation separately for BOLD and VASO, by summing the z-scores of all the layer-bins for block- and event-wise stimulation. We then subtracted the sum of the event-wise from the block-wise results and normalized them to the latter. Across subjects, detection sensitivity decreased 36 % in BOLD and 22 % in VASO. Note, we performed 1-2

block-wise and 2-4 event-wise stimulation runs per participant. Still, the direct comparison of  
block- and event-wise stimulation shows that it is possible to use event-related designs within  
an acceptable acquisition time of 25 minutes (see **Figure 4A**).

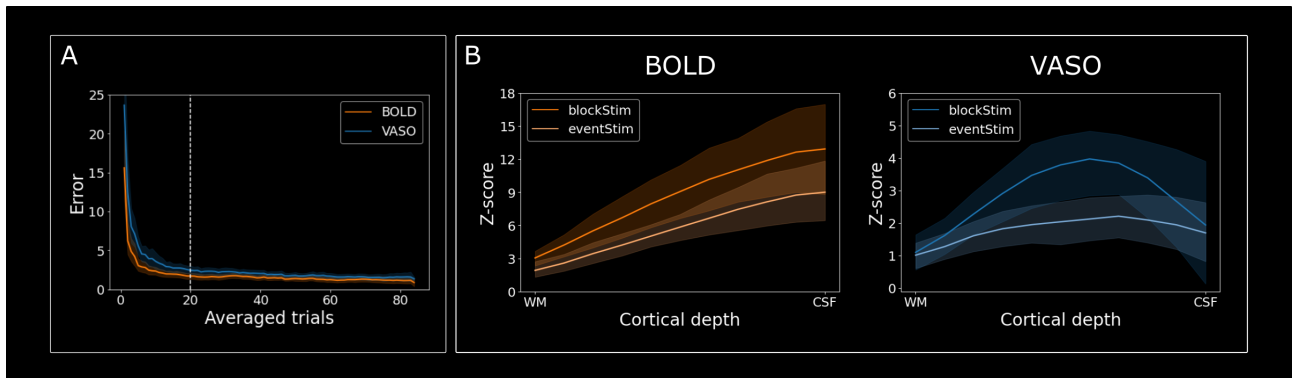

**Figure 4: VASO responses stabilize after 20 averaged trials and event-wise stimulation yields lower but plausible activation compared to block-wise stimulation.** **A** Response stabilization curves for BOLD and VASO. Note, a run had a maximum of 84 trials. Thus, the last datapoint on the x-axis constitutes the difference between the average response of a run and the overall mean. Dashed vertical line shows the 5% of the error dynamic range for VASO. **B** Data from **Figure 2C** and **Figure 3C** are replotted to compare block- with event-wise stimulation directly for BOLD (left) and VASO (right) separately. Note, we performed 1-2 block-wise and 2-4 event-wise stimulation runs per participant.

## Exploratory results in the somatosensory cortex

In 5 sessions we succeeded in including both the visual and right somatosensory cortex in the  
fMRI imaging slab. Therefore, we can explore the applicability of event-related stimulation  
using VASO in S1. Here, we obtained similar results as in V1, albeit less clear.

In general, fingertips are represented sparsely along the cortical sheet. Therefore, even if  
we managed to include S1 in some participants, we did not necessarily include all five finger  
representations for each of them. Therefore, we limited our analysis to the likely site of one  
fingertip. **Figure 5A** shows GLM activation in S1 in response to block-wise stimulation (z-  
scores, contrast: stimulation vs. rest) overlaid on an MP2RAGE UNI image. For the BOLD  
data, we can see clear activation. For VASO, only a few voxels exceed the detection threshold.  
Nevertheless, we were able to observe sustained periods of elevated signal in both imaging  
modalities (**Figure 5B**) and group-level layer profiles showing GLM activation in response  
to block-wise stimulation (**Figure 5C**). Also the event-wise stimulation results show similar  
qualities of the responses in V1, both with higher noise levels (**Figure 5D&E**). Namely, just

like in V1, in S1 VASO responses in superficial layers show indications of a later peak compared 299  
to deeper layers. These results point towards the applicability of event-wise stimulation using 300  
VASO in S1. 301

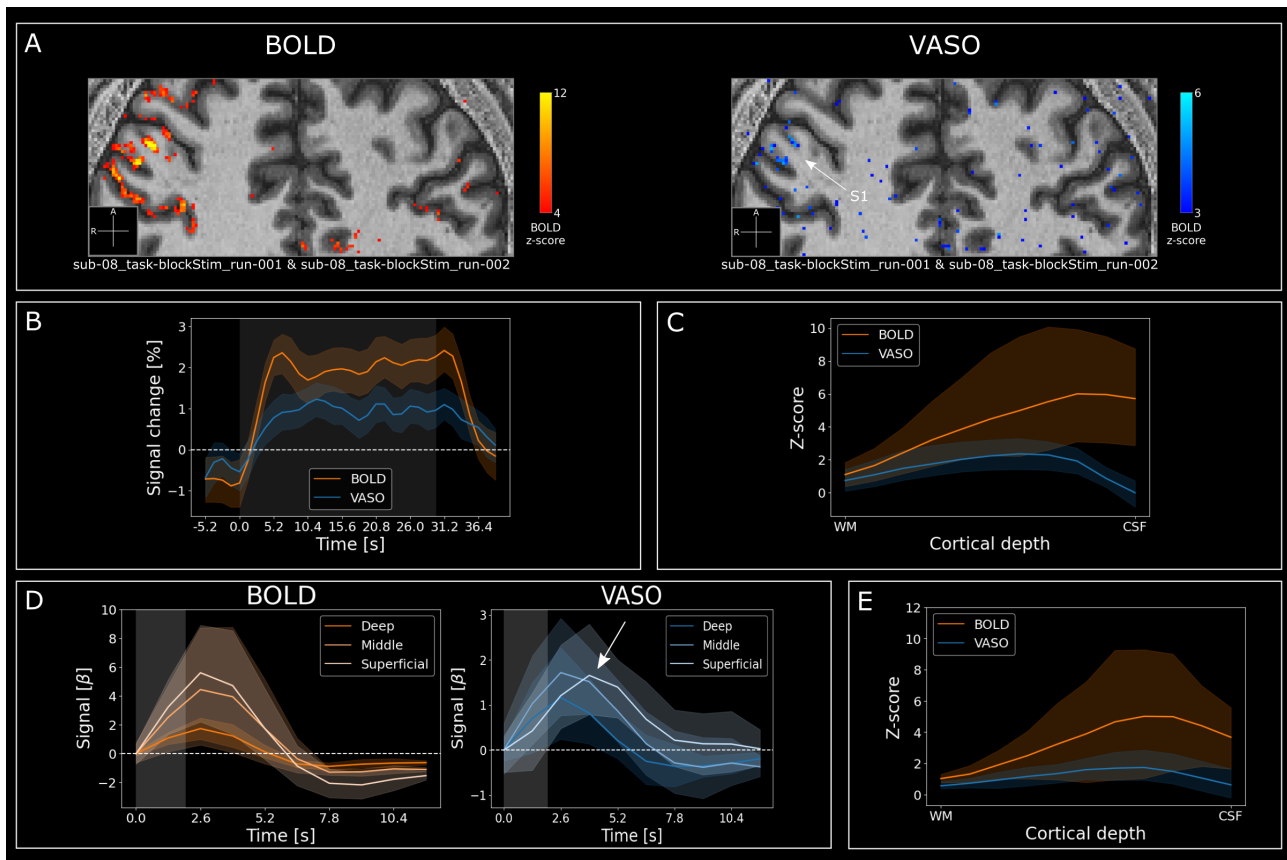

**Figure 5: Exploratory results point towards feasibility of event-related designs in S1 using VASO.** A GLM activation in response to block-wise stimulation (z-scores, contrast: stimulation vs. rest) overlaid on MP2RAGE UNI image. Note that here we show data from two runs (25 minutes). B Group-level ( $n = 5$ ) averages showing the BOLD and VASO signal change across all layers in response to stimuli with a duration of 30s (shaded gray area). Colored shaded areas represent 95% confidence intervals across blocks. C Group-level ( $n = 5$ ) layer profiles showing GLM activation in response to block-wise stimulation (z-scores, contrast: stimulation vs. rest) for BOLD and VASO in S1 across cortical depths. Colored shaded areas show 95% confidence intervals across participants. D Group-level ( $n = 5$ ) average responses showing the BOLD (left) and VASO (right) model fit (FIR model with 10 predictors) for three layers (deep, middle, superficial) in response to stimuli with a duration of 2 seconds (shaded gray area). The colored shaded areas represent 95% confidence intervals across runs. E Group-level ( $n = 5$ ) layer profiles showing GLM activation in response to stimulation of 2 seconds (similar to **Figure 3C**, z-scores, contrast: stimulation vs. rest) for BOLD and VASO in S1 across cortical depths. Colored shaded areas represent 95% confidence intervals across participants.



## Comparing short and long TR protocols

Because we stepped into uncharted territory with our short acquisition times, we wanted to test whether the activation profiles across cortical depth are influenced by the short TR compared to conventional acquisitions with longer intervals between readouts. SS-SI VASO is based on the assumption that the intravascular water magnetization in the imaging slab has been inverted only once (L. Huber et al., 2014). This means that blood should be refilled in the period between two consecutive inversion pulses (here 2.57s). While this condition is expected to be fulfilled for the thin imaging slab used here, this has not been validated for the unprecedented fast imaging of this study. Therefore, we directly compared data from our new protocol and a more conservative approach. In the latter, we added 500ms delays between the nulled and BOLD acquisitions and between the BOLD and the consecutive inversion pulse. As this decreased the efficiency of our temporal sampling, we tested this approach using block-wise stimulation (30s on-off) with our visuo-tactile paradigm. We found several differences between the two types of acquisitions. First, we observed a reduction of T1w contrast for short compared to long TR acquisitions (**Figure 6A**). While we can clearly see the borders between GM and CSF/WM, for long TRs, the borders between GM and WM are less visible for our short TR protocol. This different structural T1-contrast across TRs is expected due to the different magnetization steady-state in absence of a relaxation delay before each inversion pulse. Because of the decreased contrast in short TR protocols, we used the whole brain anatomical MP2RAGE images and registered them to the functional data in order to delineate GM/WM and GM/CSF borders as commonly done in GE-BOLD type acquisitions. Second, the tSNR of the BOLD time-course was slightly higher for the long TR, while the VASO tSNR was largely unaffected (Figure 6B). The higher tSNR for BOLD for long TRs is likely due to the further signal relaxation of the longitudinal tissue magnetization subsequent to the VASO readout. Finally, the statistical GLM activation in response to stimulation (z-scores, contrast: stimulation vs. rest) was slightly higher for long- than short TRs (**Figure 6C**). However, this difference was rather uniform across cortical depths. The slightly lower z-scores are to be expected due to the lower tSNR in BOLD. Evidently, this hampered the fit of the GLM for the BOLD data. The differences we see for the VASO data can be attributed to the dynamic division of BOLD and nulled data during the BOLD-correction step of the VASO data. Here, a higher noise level



of the divisor will also enhance noise in the resulting signal. In conclusion, as can be seen 332  
in **Figure 6C**, the layer-profiles for long and short TRs were qualitatively not substantially 333  
different thus ensuring comparable signal origin and applicability of the VASO assumptions 334  
(L. Huber et al., 2014). 335

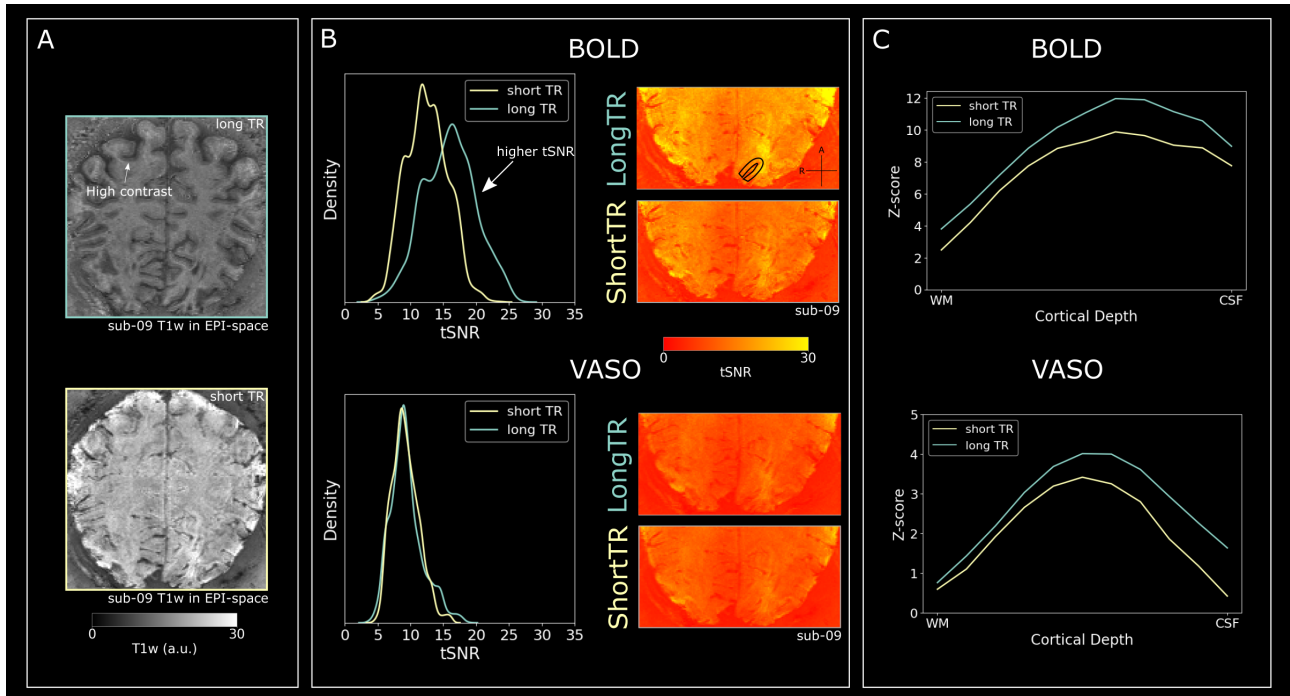

**Figure 6: Comparison between short and long TR fMRI data in two participants.** **A** T1w image in EPI-space for long (upper) and short (lower) TR fMRI data. Note the high tissue contrast between white and gray matter in the long TR data. **B** tSNR comparison between short and long TRs. Right: tSNR maps for long and short TR data. Left: Voxel-wise tSNR kernel density estimation plots (similar to smoothed histograms) for both participants together. Values were taken from V1 gray matter (example indicated in the uppermost map on the right). **C** Comparison between short and long TR data activation (z-scores, contrast: stimulation vs. rest) across cortical depths for both participants together. Values were taken from the same V1 gray matter regions as tSNR.

## Discussion

336

### Summary of results

337

In this work, we characterized the applicability of VASO for event-related paradigms. With a short 895 ms volume acquisition TR, we were able to capture the haemodynamic response for VASO and BOLD within a few ( $\sim 20$ ) average trials. Furthermore, the short TR and high specificity of VASO enabled us to show subtle laminar-dependent timing differences of neural processing and vascular reactivity features. Specifically, superficial layers showed delayed responses in VASO but not in BOLD. Besides general advantages of event-related designs, we believe that this result demonstrates the added value of employing short stimulus paradigms using VASO, which greatly increases the range of possible research questions to be addressed with CBV-based laminar fMRI.

338

339

340

341

342

343

344

345

346

### Response peak location and timing across cortical depth

347

A distinctive feature of VASO is its microvascular weighting, which leads to strong activation of middle cortical layers during bottom-up processing (Akbari et al., 2022; Jin and Kim, 2008; Y. Yu et al., 2019). In our data, microvascular weighting of VASO seems to vary depending on stimulus duration. For block-wise stimulation we observe a peak in middle layers (**Figure 2C**). For event-wise stimulation we observe a peak between middle and superficial layers (**Figure 3C**). The subtle movement of the peak towards the superficial layers from block- to event-wise stimulation could hint at decreased microvascular weighting in VASO when employing short stimulation durations. CBV peak responses towards the superficial layers for short stimulation durations, as shown here, are in agreement with various lines of research. For example, in cats, Jin and Kim (2008) performed a time dependent analysis of responses to block-wise stimulation using GE-BOLD, CBV weighted (with monocrySTALLINE iron oxide nanoparticle [MION] contrast agent) and CBF type imaging. They found that CBV signals are weighted towards the cortical surface at earlier stages of the response and only later develop the full weighting towards the microvasculature. Another example is Hirano et al. (2011), where they report BOLD, CBF and CBV (also measured with MION) data in rats. For stimulation durations comparable to ours, the authors find highest CBV amplitudes in superficial layers. In contrast to Hirano et al.

348

349

350

351

352

353

354

355

356

357

358

359

360

361

362

363

(2011), Shen et al. (2008) report strongest CBV responses to short stimuli in middle layers. 364  
Note however, that for Shen et al. (2008) the middle layer response is only significantly different 365  
from deep but not superficial layers. Therefore, the results from Shen et al. (2008) also match 366  
our data, as we observe a peak between middle to superficial layers for event-wise stimulation. 367

In these preclinical studies, the relative microvascular weighting of CBV responses for short 368  
compared to long stimuli has been discussed in the context of laminar differences in the vascular 369  
architecture. Specifically, microvascular blood compartments tend to have the earliest onset 370  
times ( $<1$  s, Silva and Koretsky, 2002; Tian et al., 2010; X. Yu et al., 2014), but take long to 371  
peak ( $>15$  s) (Mandeville, 2012). On the other hand, larger, actively muscle-controlled arterial 372  
compartments closer to the cortical surface, tend to have later onset times ( $>1$  s, Tian et al., 373  
2010) but shorter times to peaks (Kennerley et al., 2012). For similar investigations of response 374  
times across CBV compartments in humans, time-resolved CBV measurements are necessary, 375  
but were not available so far. 376

Our event-related results indicate, for the first time, similar reactivity of CBV-compartments 377  
in humans. Specifically, we report earliest responses in deep and middle layers, paralleling the 378  
early responses in microvascular compartments found in rodent models (X. Yu et al., 2014). 379  
Furthermore, we find a delayed response-peak in superficial layers for VASO, supporting later 380  
macrovascular responses (Kennerley et al., 2012; Tian et al., 2010). To our knowledge, this is 381  
the first demonstration of laminar response time differences in humans using non-invasive CBV 382  
measurements. On the other hand, we do not find the longer time to peak for superficial layers 383  
in the BOLD data, as reported by Siero and colleagues (Siero et al., 2011; Siero et al., 2013). 384  
However, this can likely be explained by two factors. Firstly, Siero et al. report a smaller effect 385  
size. In their data, the difference in the time to peak is  $\sim 0.23$  s/mm (Siero et al., 2011). In 386  
the visual cortex, this would result in peak time differences between deep and superficial layers 387  
of  $\sim 0.6$  s. This effect is much smaller than in our VASO data (peak time differences of about 388  
 $1.3$  s). Secondly, the higher temporal resolution and shorter stimulus durations in their studies 389  
compared to ours. Here, we invested image encoding time in higher spatial resolutions and used 390  
longer stimuli. This allowed us to differentiate layer effects with less partial voluming of the 391  
temporal evolution of pial vessels. The subtle depth-dependent timing of BOLD- and CBV- 392  
haemodynamic responses across stimulus durations in humans could be investigated further by 393

using systematic jitters to increase effective sampling rate.

394

## Considerations for fast event-related VASO

395

In VASO protocols with longer acquisition times (e.g. >1.5 s volume acquisition time), the inherent T1 contrast is sufficient to delineate GM/WM and GM/CSF borders in EPI space (L. Huber et al., 2015). However, in VASO protocols with shorter acquisition times (e.g. <1 s volume acquisition time), such as the one used here, the T1 contrast of the EPI images is weaker due to reduced relaxation times (**Figure 6A**). Thus, acquisition and registration of anatomical reference images is necessary. Another option for future studies might be to acquire additional VASO run(s) with longer acquisition times. For example, the acquisition of run(s) with a long TR could be straightforwardly implemented in the paradigm when acquiring independent localizers with strong tasks using block-wise stimulation. Furthermore, we saw slightly lower tSNR values in the BOLD data for short TR acquisitions (**Figure 6B**). This also translated into slightly decreased activation scores (**Figure 6C**). We estimated the decrease in detection sensitivity when employing event-related paradigms with 2 s stimulation as opposed to 30 s on/off block-designs and found a 36 and 22 % decrease in detection sensitivity for BOLD and VASO, respectively. Therefore, if event-related paradigms are crucial, and detection sensitivity is required to remain comparable to block-wise stimulation, up to 2 times longer experiments may become necessary in future event-related layer-fMRI VASO studies.

411

## Limitations & Future directions

412

We see the present study as a proof of concept that event-related stimulation is feasible using VASO. As a result, there are several aspects that can be improved in future, more extensive investigations.

415

In the design of our stimulation protocol, we opted for efficiency. Therefore, the inter-trial intervals we chose are rather short (3-10 s), which lead to highly overlapping haemodynamic responses between events. While this might be appropriate for neuroscience experiments in order to investigate depth-dependent differences between haemodynamic responses to different stimuli (Dale and Buckner, 1997; Glover, 1999), investigations of the haemodynamic response per se might be compromised. Rather, longer inter-trial intervals could be chosen to let the

421

response return to baseline (van Dijk et al., 2021). This would allow researchers to account 422  
for higher-order non-linear HRF effects that are not commonly considered in the linear super- 423  
position assumption of GLM/ FIR analysis models. However, this would render the paradigm 424  
less efficient. Another aspect that is compromised by fast acquisition times at high resolutions 425  
is brain coverage. The coverage of our high temporo-spatial VASO protocol ( $133 \times 129.542$  426  
 $\times 114.08$  mm) was sufficient to image V1 in all, and V1 and S1 in some participants. This is 427  
common for most layer-fMRI applications, which focus on single areas of interest (Schluppeck 428  
et al., 2018). However, if the goal is to study brain-wide distributed networks, this is not 429  
sufficient. Therefore, sacrificing imaging speed might be necessary to investigate connectivity 430  
between distant brain regions across cortical depth (Koiso et al., 2022). 431

In general, we see various routes for future applications. The most immediate benefit would 432  
be for neuroscientific applications that necessitate short TRs for efficient sampling. For exam- 433  
ple, Gau et al. (2020) report multimodal influences on the response magnitude in deep layers 434  
of the primary auditory cortex. Here, we also found indications of multimodal influences on 435  
the response timing in deep layers of V1. (**Supplementary Figure S3**). Future studies could 436  
leverage short acquisition times to investigate how these different aspects of multimodal inter- 437  
actions can be integrated. Furthermore, paradigms that rely on irregular perceptual switches 438  
(e.g. Schneider et al., 2019) would benefit from shorter TRs, as scan time would be dramatically 439  
decreased while still efficiently sampling different cognitive states. Finally, one of the promises 440  
of layer-fMRI is to investigate the directionality of input and output to cortical areas (L. Huber 441  
et al., 2017). Methods like Granger causality (Goebel et al., 2003) or dynamic causal modeling 442  
(Friston, 2012) may further corroborate investigations of the directional connectivity, however, 443  
these methods are highly reliant on fast sampling of responses which, to date, was not available 444  
with VASO. With our advances in short TRs in VASO, we are approaching the feasibility of 445  
these methods in future applications. 446

Finally, measuring different aspects of the haemodynamic response (CBF, CBV, CMRO2 447  
and BOLD) is pivotal for its complete characterization (Uludağ et al., 2009). Siero and col- 448  
leagues have investigated the haemodynamic response to short stimuli across cortical depths in 449  
humans using BOLD fMRI (Siero et al., 2015; Siero et al., 2011; Siero et al., 2013). However, the 450  
invasive nature, constrained sampling efficiency, and low SNR of CBF and CBV measurements 451

have so far hindered thorough investigations of the CBF- and CBV- haemodynamic response 452  
at the laminar level in humans. Here, we demonstrate laminar response time differences in 453  
humans using non-invasive CBV measurements. We believe that with our implementation of 454  
fast VASO acquisition, we have enabled crucial investigations of the cortical depth-dependent 455  
evolution of biophysical hemodynamic (Havlicek and Uludağ, 2020; Puckett et al., 2016) and 456  
neurophysiological processes (Petridou and Siero, 2019). 457

## Conclusion 458

High-resolution VASO has proven to be a robust method to study brain function across cortical 459  
depth. For an even wider application in neuroscientific research, fast acquisition schemes and 460  
stimulation protocols are crucial. Huettel (2012) commented on the impact of event-related 461  
designs as follows: “No other advance—not stronger magnetic fields, not improved pulse se- 462  
quences, nor even sophisticated new analyses—has contributed more to the popularization of 463  
fMRI than event-related approaches to experimental design” (Huettel, 2012). Indeed, layer- 464  
fMRI VASO is highly dependent on strong magnetic fields, improved pulse sequences and 465  
sophisticated analyses. Now, with this study, we hope to have contributed to the further 466  
popularization of VASO by showing that fast event-related designs are possible and provide 467  
meaningful insights. 468

## Acknowledgments 469

Data was acquired at Scannexus (Maastricht, the Netherlands). We thank Chris Wiggins for 470  
providing the 3rd order shimming tools used here. We thank Federico DeMartino for discussions 471  
on the analysis of event-related fMRI data. We thank Vojtěch Smekal for helpful discussions 472  
on the manuscript. Special thanks goes to the remaining “Maastricht layer-seminar” members 473  
Lonike Faes, Miriam Heynckes, Kenshu Koiso, Alessandra Pizzuti and Yawen Wang for count- 474  
less discussions on topics related to layer-fMRI. We thank Benedikt Poser for kindly sharing 475  
his 3D-EPI sequence code used here and helpful advice on layer-fMRI VASO optimization and 476  
reconstructions. Finally, we thank Dr. Amanda Kaas, who was supervising Sebastian Dresbach 477  
in the beginning of this project and provided the piezo-electric stimulation setup. 478

Sebastian Dresbach is supported by the ‘Robin Hood’ fund of the Faculty of Psychology 479  
and Neuroscience and the department of Cognitive Neuroscience. Laurentius Huber was funded 480  
by the NWO VENI project016.Veni.198.03 and the York-Maastricht Partnership. Scan time 481  
was kindly provided by Maastricht University Faculty of Psychology and Neuroscience via the 482  
intramural MBIC funding scheme. Rainer Goebel is partly funded by the European Research 483  
Council Grant ERC-2010-AdG269853 and Human Brain Project Grant FP7-ICT-2013-FET- 484  
F/604102. We thank Brain Innovation for supporting this project and for funding Omer Faruk 485  
Gulban while working on it. 486

## Data and Software availability statement 487

Analysis code is available on github: <<https://github.com/sdres/eventRelatedVASO>>. Data 488  
is available on OpenNeuro: <<https://openneuro.org/datasets/ds004539>>. 489

## Author Contributions 490

According to the CRediT (Contributor Roles Taxonomy) system. 491

|                              |                       |
|------------------------------|-----------------------|
| Conceptualization            | S.D., R.H., R.G.      |
| Data curation                | S.D., R.H.            |
| Formal analysis              | S.D.                  |
| Funding acquisition          | R.G.                  |
| Investigation                | S.D. R.H. R.G.        |
| Methodology                  | S.D. R.H. O.F.G. R.G. |
| Project administration       | S.D. R.H. R.G.        |
| Resources                    | S.D. R.H. R.G.        |
| Software                     | S.D. R.H. O.F.G. R.G. |
| Supervision                  | R.H. R.G.             |
| Validation                   | S.D.                  |
| Visualization                | S.D. R.H. O.F.G. R.G. |
| Writing - original draft     | S.D.                  |
| Writing - review and editing | S.D. R.H. O.F.G. R.G. |



## References

- Akbari, A., Bollmann, S., Ali, T. S., & Barth, M. (2022). Modelling the depth-dependent VASO and BOLD responses in human primary visual cortex. *Human Brain Mapping*, hbm.26094. <https://doi.org/10.1002/hbm.26094>
- Avants, B. B., Tustison, N. J., Song, G., Cook, P. A., Klein, A., & Gee, J. C. (2011). A reproducible evaluation of ANTs similarity metric performance in brain image registration. *NeuroImage*, 54(3), 2033–2044. <https://doi.org/10.1016/j.neuroimage.2010.09.025>
- Bastos, A. M., Usrey, W. M., Adams, R. A., Mangun, G. R., Fries, P., & Friston, K. J. (2012). Canonical Microcircuits for Predictive Coding. *Neuron*, 76(4), 695–711. <https://doi.org/10.1016/j.neuron.2012.10.038>
- Cox, R. W. (1996). AFNI: Software for analysis and visualization of functional magnetic resonance neuroimages. *Computers and Biomedical Research*, 29(3), 162–173. <https://doi.org/10.1006/cbmr.1996.0014>
- Dale, A. M., & Buckner, R. L. (1997). Selective averaging of rapidly presented individual trials using fMRI. *Human Brain Mapping*, 5(5), 329–340. [https://doi.org/10.1002/\(SICI\)1097-0193\(1997\)5:5<329::AID-HBM1>3.0.CO;2-5](https://doi.org/10.1002/(SICI)1097-0193(1997)5:5<329::AID-HBM1>3.0.CO;2-5)
- De Martino, F., Zimmermann, J., Muckli, L., Ugurbil, K., Yacoub, E., & Goebel, R. (2013). Cortical Depth Dependent Functional Responses in Humans at 7T: Improved Specificity with 3D GRASE (N. Zhang, Ed.). *PLoS ONE*, 8(3), e60514. <https://doi.org/10.1371/journal.pone.0060514>
- Douglas, R. J., & Martin, K. A. (2004). Neuronal circuits of the neocortex. *Annual Review of Neuroscience*, 27, 419–451. <https://doi.org/10.1146/annurev.neuro.27.070203.144152>
- Felleman, D. J., & Van Essen, D. C. (1991). Distributed hierarchical processing in the primate cerebral cortex. *Cerebral Cortex*, 1(1), 1–47. <https://doi.org/10.1093/cercor/1.1.1>
- Formisano, E., Linden, D. E. J., Salle, F. D., Trojano, L., Esposito, F., Sack, A. T., Grossi, D., Zanella, F. E., & Goebel, R. (2002). Tracking the Mind’s Image in the Brain I: Time-Resolved fMRI during Visuospatial Mental Imagery.
- Friston, K. J. (2012). DCM for complex-valued data: Cross-spectra, coherence and phase-delays, 17.

- Gau, R., Bazin, P.-L., Trampel, R., Turner, R., & Noppeney, U. (2020). Resolving multisensory and attentional influences across cortical depth in sensory cortices. *eLife*, *9*, e46856. <https://doi.org/10.7554/eLife.46856>
- Glover, G. H. (1999). Deconvolution of Impulse Response in Event-Related BOLD fMRI. *NeuroImage*, *9*(4), 416–429. <https://doi.org/10.1006/nimg.1998.0419>
- Goebel, R., Roebroeck, A., Kim, D. S., & Formisano, E. (2003). Investigating directed cortical interactions in time-resolved fMRI data using vector autoregressive modeling and Granger causality mapping. *Magnetic Resonance Imaging*. <https://doi.org/10.1016/j.mri.2003.08.026>
- Havlicek, M., & Uludağ, K. (2020). A dynamical model of the laminar BOLD response [Publisher: Elsevier Inc.]. *NeuroImage*, *204*, 116209. <https://doi.org/10.1016/j.neuroimage.2019.116209>
- Heynckes, M., Lage-Castellanos, A., De Weerd, P., Formisano, E., & De Martino, F. (2023). Layer-specific correlates of detected and undetected auditory targets during attention. *Current Research in Neurobiology*, *4*, 100075. <https://doi.org/10.1016/j.crneur.2023.100075>
- Hirano, Y., Stefanovic, B., & Silva, A. C. (2011). Spatiotemporal evolution of the functional magnetic resonance imaging response to ultrashort stimuli. *Journal of Neuroscience*, *31*(4), 1440–1447. <https://doi.org/10.1523/JNEUROSCI.3986-10.2011>
- Hua, J., Jones, C. K., Qin, Q., & van Zijl, P. C. M. (2013). Implementation of vascular-space-occupancy MRI at 7T: 3D MT-VASO MRI at 7T. *Magnetic Resonance in Medicine*, *69*(4), 1003–1013. <https://doi.org/10.1002/mrm.24334>
- Huber, L., Goense, J., Kennerley, A. J., Trampel, R., Guidi, M., Reimer, E., Ivanov, D., Neef, N., Gauthier, C. J., Turner, R., & Möller, H. E. (2015). Cortical lamina-dependent blood volume changes in human brain at 7T [Publisher: Elsevier Inc.]. *NeuroImage*, *107*, 23–33. <https://doi.org/10.1016/j.neuroimage.2014.11.046>
- Huber, L., Handwerker, D. A., Jangraw, D. C., Chen, G., Hall, A., Stüber, C., Gonzalez-Castillo, J., Ivanov, D., Marrett, S., Guidi, M., Goense, J., Poser, B. A., & Bandettini, P. A. (2017). High-Resolution CBV-fMRI Allows Mapping of Laminar Activity and

- Connectivity of Cortical Input and Output in Human M1. *Neuron*, 96(6), 1253–1263.e7.  
<https://doi.org/10.1016/j.neuron.2017.11.005>
- Huber, L., Ivanov, D., Krieger, S. N., Streicher, M. N., Mildner, T., Poser, B. A., Möller, H. E., & Turner, R. (2014). Slab-selective, BOLD-corrected VASO at 7 tesla provides measures of cerebral blood volume reactivity with high signal-to-noise ratio. *Magnetic Resonance in Medicine*, 72(1), 137–148. <https://doi.org/10.1002/mrm.24916>
- Huber, L., Uludağ, K., & Möller, H. E. (2019). Non-BOLD contrast for laminar fMRI in humans: CBF, CBV, and CMRO2. *NeuroImage*, 197(February 2017), 742–760. <https://doi.org/10.1016/j.neuroimage.2017.07.041>
- Huber, L. (, Poser, B. A., Bandettini, P. A., Arora, K., Wagstyl, K., Cho, S., Goense, J., Nothnagel, N., Morgan, A. T., van den Hurk, J., Müller, A. K., Reynolds, R. C., Glen, D. R., Goebel, R., & Gulban, O. F. (2021). LayNii: A software suite for layer-fMRI. *NeuroImage*, 237, 118091. <https://doi.org/10.1016/j.neuroimage.2021.118091>
- Huettel, S. A. (2012). Event-related fMRI in cognition. *NeuroImage*, 62(2), 1152–1156. <https://doi.org/10.1016/j.neuroimage.2011.08.113>
- Jin, T., & Kim, S. G. (2008). Cortical layer-dependent dynamic blood oxygenation, cerebral blood flow and cerebral blood volume responses during visual stimulation. *NeuroImage*, 43(1), 1–9. <https://doi.org/10.1016/j.neuroimage.2008.06.029>
- Kennerley, A. J., Harris, S., Bruyns-Haylett, M., Boorman, L., Zheng, Y., Jones, M., & Berwick, J. (2012). Early and late stimulus-evoked cortical hemodynamic responses provide insight into the neurogenic nature of neurovascular coupling [Publisher: Nature Publishing Group]. *Journal of Cerebral Blood Flow and Metabolism*, 32(3), 468–480. <https://doi.org/10.1038/jcbfm.2011.163>
- Koiso, K., Müller, A. K., Akamatsu, K., Dresbach, S., Wiggins, C. J., Gulban, O. F., Goebel, R., Miyawaki, Y., Poser, B. A., & Huber, L. (2022). *Acquisition and processing methods of whole-brain layer-fMRI VASO and BOLD: The Kenshu dataset* (preprint). Neuroscience. <https://doi.org/10.1101/2022.08.19.504502>
- Lu, H., Golay, X., Pekar, J. J., & Van Zijl, P. C. (2003). Functional magnetic resonance imaging based on changes in vascular space occupancy [Publisher: John Wiley and Sons Inc.]. *Magnetic Resonance in Medicine*, 50(2), 263–274. <https://doi.org/10.1002/mrm.10519>

- Mandeville, J. B. (2012). IRON fMRI measurements of CBV and implications for BOLD signal. *NeuroImage*, *62*(2), 1000–1008. <https://doi.org/10.1016/j.neuroimage.2012.01.070>
- Markov, N. T., Vezoli, J., Chameau, P., Falchier, A., Quilodran, R., Huissoud, C., Lamy, C., Misery, P., Giroud, P., Ullman, S., Barone, P., Dehay, C., Knoblauch, K., & Kennedy, H. (2014). Anatomy of hierarchy: Feedforward and feedback pathways in macaque visual cortex. *Journal of Comparative Neurology*, *522*(1), 225–259. <https://doi.org/10.1002/cne.23458>
- Marques, J. P., Kober, T., Krueger, G., van der Zwaag, W., Van de Moortele, P. F., & Gruetter, R. (2010). MP2RAGE, a self bias-field corrected sequence for improved segmentation and T1-mapping at high field [Publisher: Elsevier Inc.]. *NeuroImage*, *49*(2), 1271–1281. <https://doi.org/10.1016/j.neuroimage.2009.10.002>
- McCarthy, P. (2023). FSLeYes. <https://doi.org/10.5281/zenodo.7657800>
- Menon, R. S., & Goodyear, B. G. (1999). Submillimeter functional localization in human striate cortex using BOLD contrast at 4 Tesla: Implications for the vascular point-spread function. *Magnetic Resonance in Medicine*, *41*(2), 230–235. [https://doi.org/10.1002/\(SICI\)1522-2594\(199902\)41:2<230::AID-MRM3>3.0.CO;2-O](https://doi.org/10.1002/(SICI)1522-2594(199902)41:2<230::AID-MRM3>3.0.CO;2-O)
- Nakamura, S., Nakaura, T., Kidoh, M., Awai, K., Namimoto, T., Yoshinaka, I., Harada, K., & Yamashita, Y. (2016). Efficacy of the projection onto convex sets (POCS) algorithm at Gd-EOB-DTPA-enhanced hepatobiliary-phase hepatic MRI [Publisher: SpringerOpen]. *SpringerPlus*, *5*(1). <https://doi.org/10.1186/s40064-016-2968-9>
- Peirce, J., Gray, J. R., Simpson, S., MacAskill, M., Höchenberger, R., Sogo, H., Kastman, E., & Lindeløv, J. K. (2019). PsychoPy2: Experiments in behavior made easy. *Behavior Research Methods*, *51*(1), 195–203. <https://doi.org/10.3758/s13428-018-01193-y>
- Peirce, J. W. (2007). PsychoPy-Psychophysics software in Python. *Journal of Neuroscience Methods*, *162*(1-2), 8–13. <https://doi.org/10.1016/j.jneumeth.2006.11.017>
- Persichetti, A. S., Avery, J. A., Huber, L., Merriam, E. P., & Martin, A. (2020). Layer-Specific Contributions to Imagined and Executed Hand Movements in Human Primary Motor Cortex [Publisher: Elsevier Ltd.]. *Current Biology*, 1–5. <https://doi.org/10.1016/j.cub.2020.02.046>

the block design was used to verify that the design is not screwed up by the event related setup

- Petridou, N., & Siero, J. C. W. (2019). Laminar fMRI : What can the time domain tell us ? [Publisher: Elsevier Ltd]. *NeuroImage*, *197*(February 2017), 761–771. <https://doi.org/10.1016/j.neuroimage.2017.07.040>
- Polimeni, J. R., Fischl, B., Greve, D. N., & Wald, L. L. (2010). Laminar analysis of 7T BOLD using an imposed spatial activation pattern in human V1. *NeuroImage*, *52*(4), 1334–1346. <https://doi.org/10.1016/j.neuroimage.2010.05.005>
- Poser, B. A., Koopmans, P. J., Witzel, T., Wald, L. L., & Barth, M. (2010). Three dimensional echo-planar imaging at 7 Tesla [Publisher: Elsevier Inc.]. *NeuroImage*, *51*(1), 261–266. <https://doi.org/10.1016/j.neuroimage.2010.01.108>
- Puckett, A. M., Aquino, K. M., Robinson, P. A., Breakspear, M., & Schira, M. M. (2016). The spatiotemporal hemodynamic response function for depth-dependent functional imaging of human cortex, 9.
- Rosen, B. R., Buckner, R. L., & Dale, A. M. (1998). Event-related functional MRI: Past, present, and future. *Proceedings of the National Academy of Sciences*, *95*(3), 773–780. <https://doi.org/10.1073/pnas.95.3.773>
- Schluppeck, D., Sanchez-Panchuelo, R. M., & Francis, S. T. (2018). Exploring structure and function of sensory cortex with 7 T MRI [Publisher: Elsevier]. *NeuroImage*, *164* (January 2017), 10–17. <https://doi.org/10.1016/j.neuroimage.2017.01.081>
- Schneider, M., Kemper, V. G., Emmerling, T. C., De Martino, F., & Goebel, R. (2019). Columnar clusters in the human motion complex reflect consciously perceived motion axis. *Proceedings of the National Academy of Sciences of the United States of America*, *116*(11), 5096–5101. <https://doi.org/10.1073/pnas.1814504116>
- Self, M. W., van Kerkoerle, T., Goebel, R., & Roelfsema, P. R. (2019). Benchmarking laminar fMRI: Neuronal spiking and synaptic activity during top-down and bottom-up processing in the different layers of cortex [Publisher: Academic Press Inc.]. *NeuroImage*, *197*, 806–817. <https://doi.org/10.1016/j.neuroimage.2017.06.045>

- Shen, Q., Ren, H., & Duong, T. Q. (2008). CBF, BOLD, CBV, and CMRO<sub>2</sub> fMRI signal temporal dynamics at 500-msec resolution. *Journal of Magnetic Resonance Imaging*, *27*(3), 599–606. <https://doi.org/10.1002/jmri.21203>
- Siero, J. C., Hendrikse, J., Hoogduin, H., Petridou, N., Luijten, P., & Donahue, M. J. (2015). Cortical depth dependence of the BOLD initial dip and poststimulus undershoot in human visual cortex at 7 Tesla [Publisher: John Wiley and Sons Inc]. *Magnetic Resonance in Medicine*, *73*(6), 2283–2295. <https://doi.org/10.1002/mrm.25349>
- Siero, J. C., Petridou, N., Hoogduin, H., Luijten, P. R., & Ramsey, N. F. (2011). Cortical depth-dependent temporal dynamics of the BOLD response in the human brain. *Journal of Cerebral Blood Flow and Metabolism*, *31*(10), 1999–2008. <https://doi.org/10.1038/jcbfm.2011.57>
- Siero, J. C., Ramsey, N. F., Hoogduin, H., Klomp, D. W., Luijten, P. R., & Petridou, N. (2013). BOLD Specificity and Dynamics Evaluated in Humans at 7 T: Comparing Gradient-Echo and Spin-Echo Hemodynamic Responses. *PLoS ONE*, *8*(1). <https://doi.org/10.1371/journal.pone.0054560>
- Silva, A. C., & Koretsky, A. P. (2002). *Laminar specificity of functional MRI onset times during somatosensory stimulation in rat* (tech. rep.). [www.pnas.org/cgi/doi/10.1073/pnas.222561899](http://www.pnas.org/cgi/doi/10.1073/pnas.222561899)
- Talagala, S. L., Sarlls, J. E., Liu, S., & Inati, S. J. (2016). Improvement of temporal signal-to-noise ratio of GRAPPA accelerated echo planar imaging using a FLASH based calibration scan [Publisher: John Wiley and Sons Inc]. *Magnetic Resonance in Medicine*, *75*(6), 2362–2371. <https://doi.org/10.1002/mrm.25846>
- Tian, P., Teng, I. C., May, L. D., Kurz, R., Lu, K., Scadeng, M., Hillman, E. M., De Crespigny, A. J., D’Arceuil, H. E., Mandeville, J. B., Marota, J. J., Rosen, B. R., Liu, T. T., Boas, D. A., Buxton, R. B., Dale, A. M., & Devor, A. (2010). Cortical depth-specific microvascular dilation underlies laminar differences in blood oxygenation level-dependent functional MRI signal. *Proceedings of the National Academy of Sciences of the United States of America*, *107*(34), 15246–15251. <https://doi.org/10.1073/pnas.1006735107>

- Turner, R. (2002). How much codex can a vein drain? Downstream dilution of activation-related cerebral blood oxygenation changes [Publisher: Elsevier]. *NeuroImage*, *16*(4), 1062–1067. <https://doi.org/10.1006/nimg.2002.1082>
- Tustison, N. J., Avants, B. B., Cook, P. A., Zheng, Y., Egan, A., Yushkevich, P. A., & Gee, J. C. (2010). N4ITK: Improved N3 bias correction. *IEEE Transactions on Medical Imaging*. <https://doi.org/10.1109/TMI.2010.2046908>
- Uludağ, K., Müller-Bierl, B., & Uğurbil, K. (2009). An integrative model for neuronal activity-induced signal changes for gradient and spin echo functional imaging. *NeuroImage*, *48*(1), 150–165. <https://doi.org/10.1016/j.neuroimage.2009.05.051>
- van Dijk, J. A., Fracasso, A., Petridou, N., & Dumoulin, S. O. (2021). Validating Linear Systems Analysis for Laminar fMRI: Temporal Additivity for Stimulus Duration Manipulations. *Brain Topography*, *34*(1), 88–101. <https://doi.org/10.1007/s10548-020-00808-y>
- Woolrich, M. W., Ripley, B. D., Brady, M., & Smith, S. M. (2001). Temporal autocorrelation in univariate linear modeling of FMRI data [Publisher: Academic Press Inc.]. *NeuroImage*, *14*(6), 1370–1386. <https://doi.org/10.1006/nimg.2001.0931>
- Yu, X., Qian, C., Chen, D. Y., Dodd, S. J., & Koretsky, A. P. (2014). Deciphering laminar-specific neural inputs with line-scanning fMRI. *Nature Methods*, *11*(1), 55–58. <https://doi.org/10.1038/nmeth.2730>
- Yu, Y., Huber, L., Yang, J., Jangraw, D. C., Handwerker, D. A., Molfese, P. J., Chen, G., Ejima, Y., Wu, J., & Bandettini, P. A. (2019). Layer-specific activation of sensory input and predictive feedback in the human primary somatosensory cortex. *Science Advances*, *5*(5), 1–10. <https://doi.org/10.1126/sciadv.aav9053>
- Yushkevich, P. A., Piven, J., Hazlett, H. C., Smith, R. G., Ho, S., Gee, J. C., & Gerig, G. (2006). User-guided 3D active contour segmentation of anatomical structures: Significantly improved efficiency and reliability. *NeuroImage*, *31*(3), 1116–1128. <https://doi.org/10.1016/j.neuroimage.2006.01.015>



## Supplementary figures

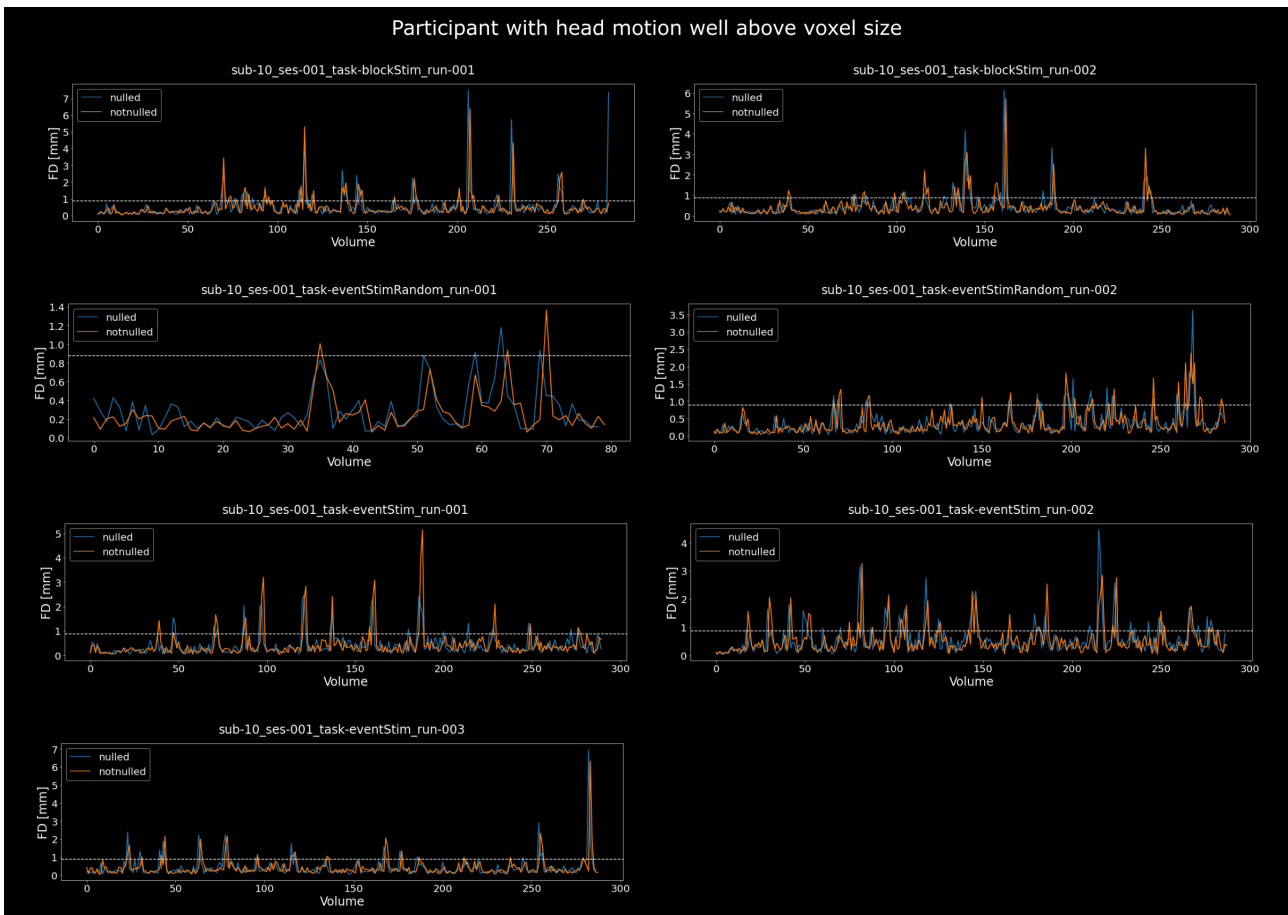

**Figure S1: Participant with excessive head motion.** Framewise displacements (FDs) for each run of the only participant consistently showing motion peaks greater than a voxel size (0.88mm, indicated by white dashed line). This participant was therefore excluded from further analyses.

**Figure S2: FIR-model results show high inter-participant variability with respect to peak layer.** Same as **Figure 3B** but for 3 individual participants (upper: sub-05, middle: sub-08, lower: sub-14). Note that the superficial layer VASO activity varies across participants. While sub-08 resembles the group results, sub-05 shows greatest activity in superficial layers and sub-14 shows lowest responses in superficial layers. Nonetheless, the delayed peak for superficial layers is preserved in all participants.

### sub-05

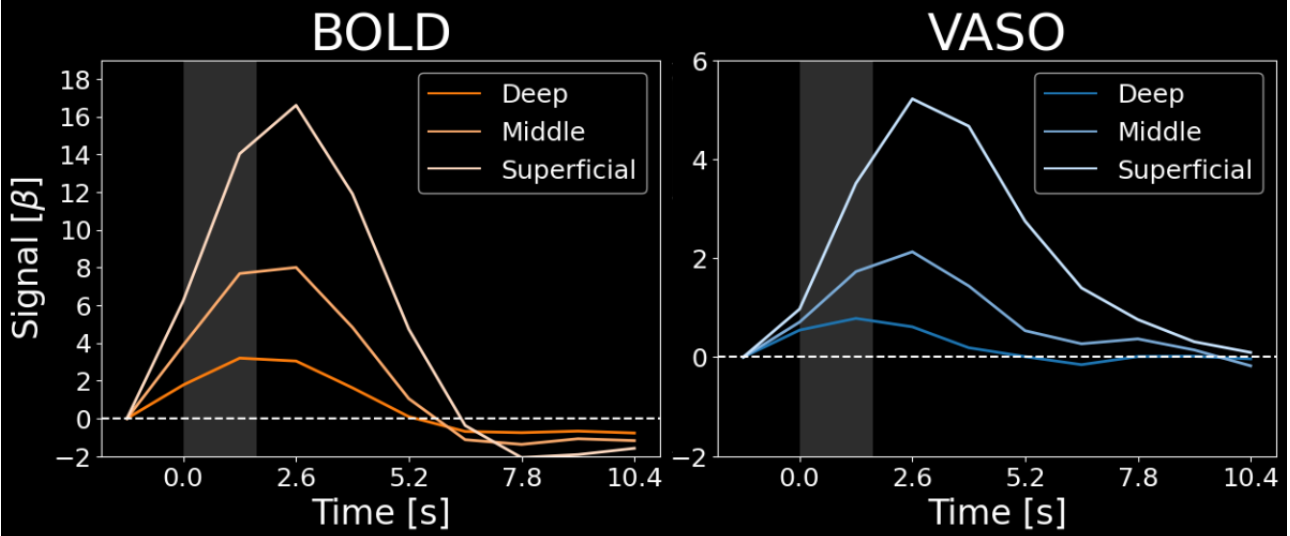

### sub-08

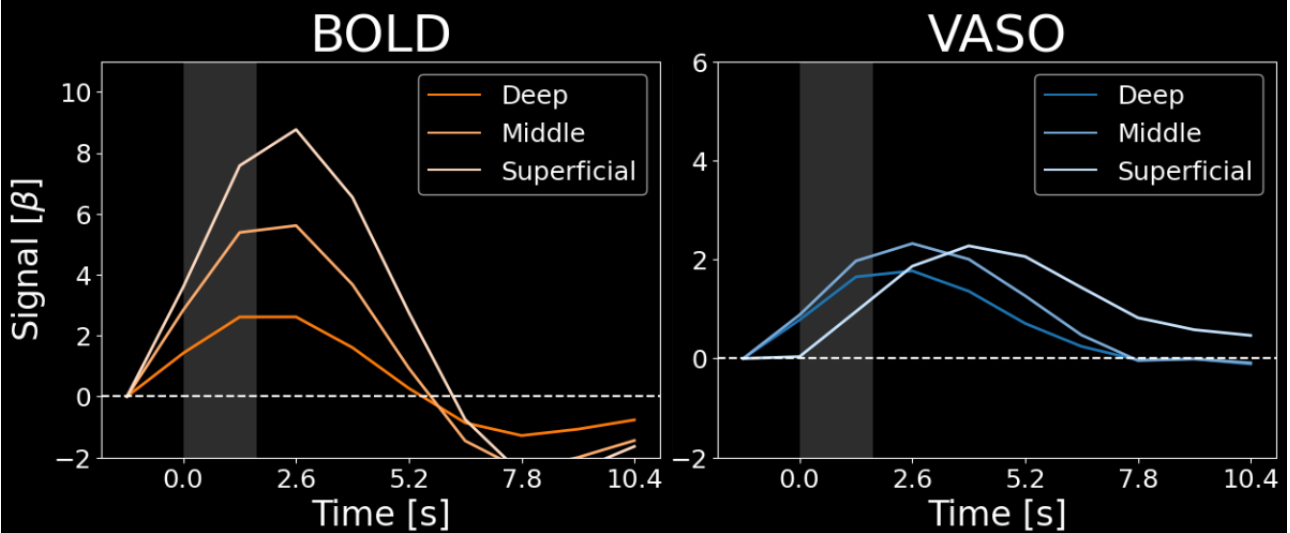

### sub-14

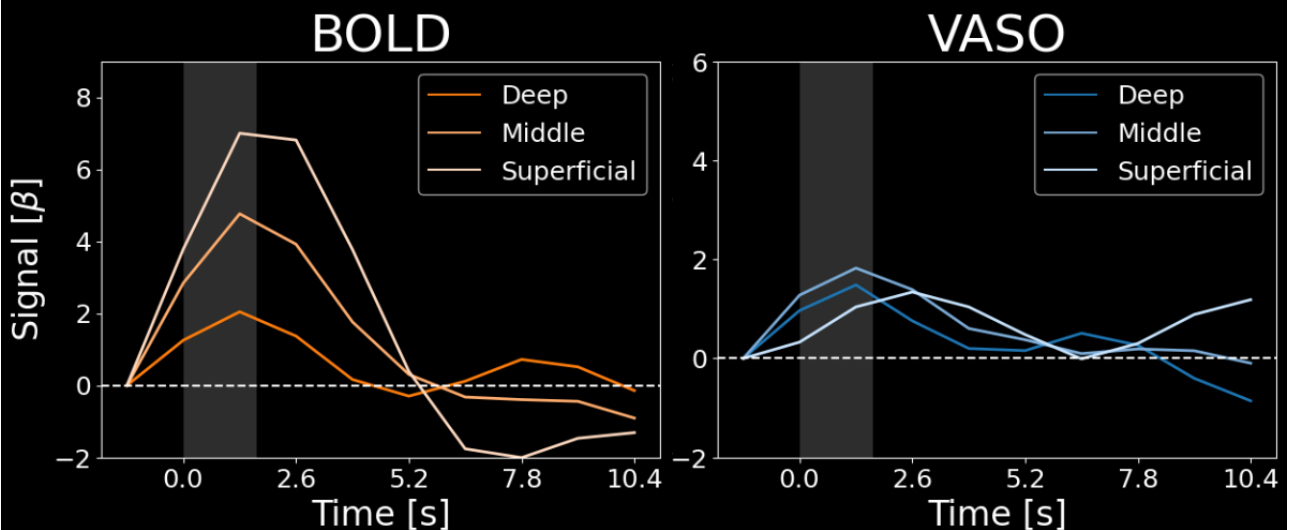

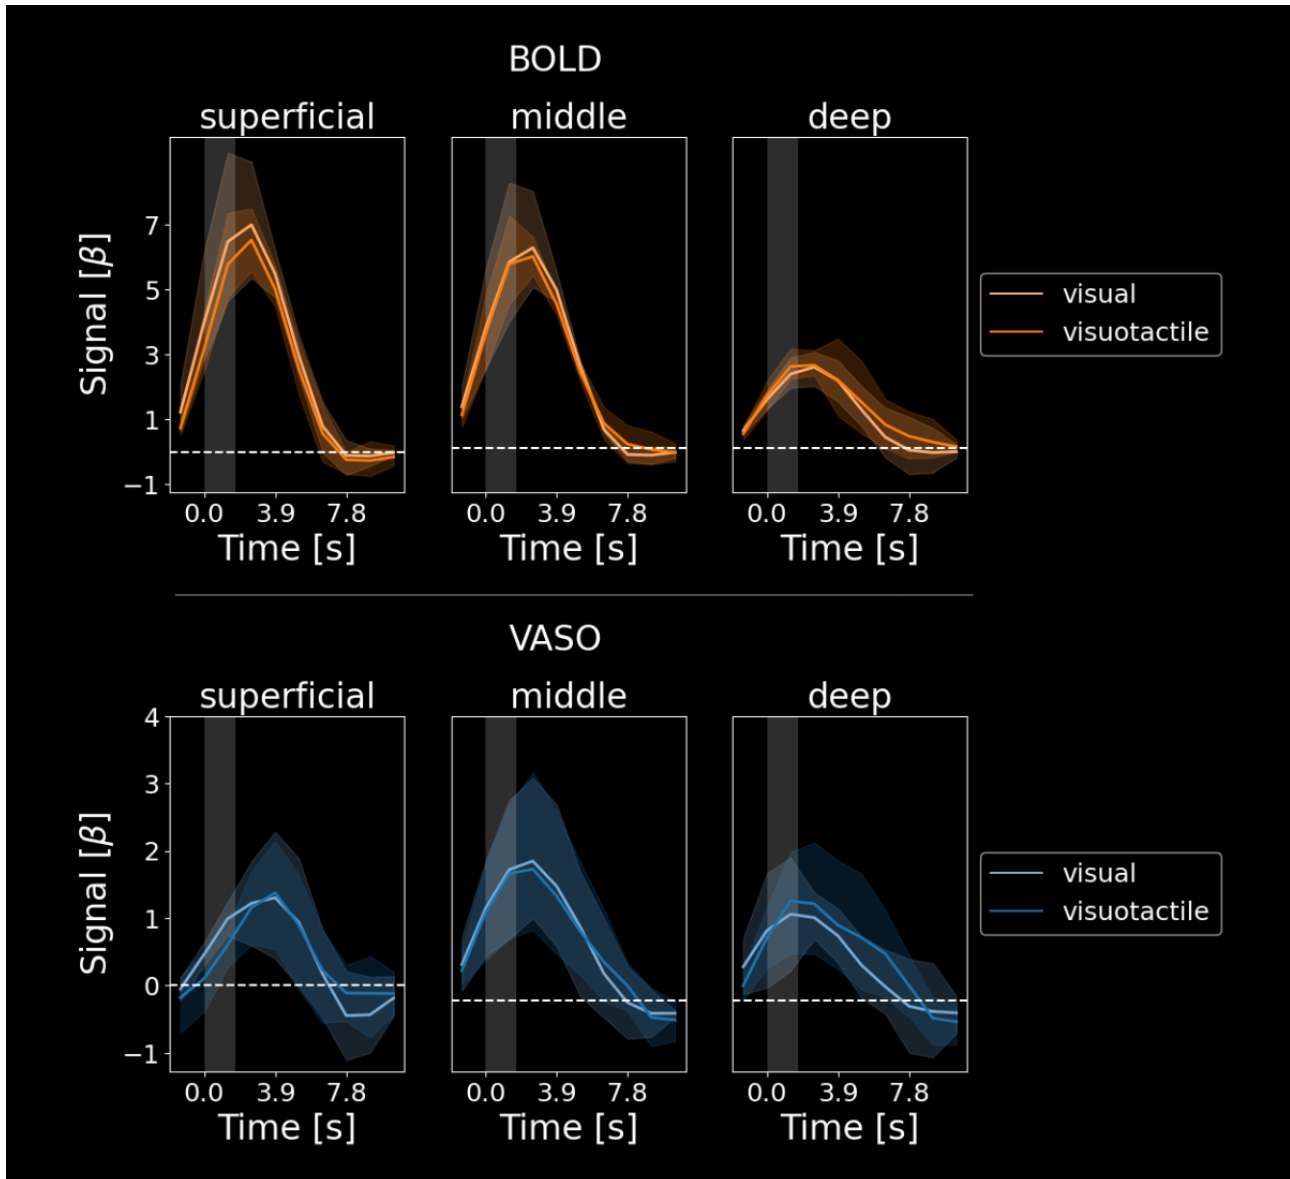

**Figure S3: Comparison between visual and visuo-tactile stimulation in V1.** BOLD (upper) and VASO (lower) activation ( $n = 4$ ) in response to visual and visuo-tactile stimulation separately. Data is plotted separately for the three layers (deep, middle, superficial). Visual and visuo-tactile stimulation evoke very similar responses in superficial and middle layers for BOLD and VASO. In deep layers, visuo-tactile stimulation shows a slightly prolonged response compared to visual stimulation only. This effect was present in the BOLD and VASO data, while being more pronounced in the latter. However, this effect is rather small (within error bars) and has to be interpreted with caution. Still, we believe that this might indicate a multisensory integration effect taking place in deep layers of V1 in response to additional tactile input. Future studies on neuroscientific event-related applications might investigate this further.
